# Supplementary material
Source: HighWire-hosted journal article supplement (https://www.canjsurg.ca/highwire/filestream/96833/field_highwire_adjunct_files/0/cjs-012318-1-at.pdf)

Appendix 1 to Kryshtalskyj M, Vance J, McAlister C. A message in a bottle: the discovery of a young medical officer's map from the 1917 Battle of Hill 70. Can J Surg 2018.

DOI: 10.1503/cjs.012318

Copyright © 2018 The Author(s) or their employer(s).

To receive this resource in an accessible format, please contact us at [cmajgroup@cmaj.ca](mailto:cmajgroup@cmaj.ca).

Online appendices are unedited and posted as supplied by the authors.

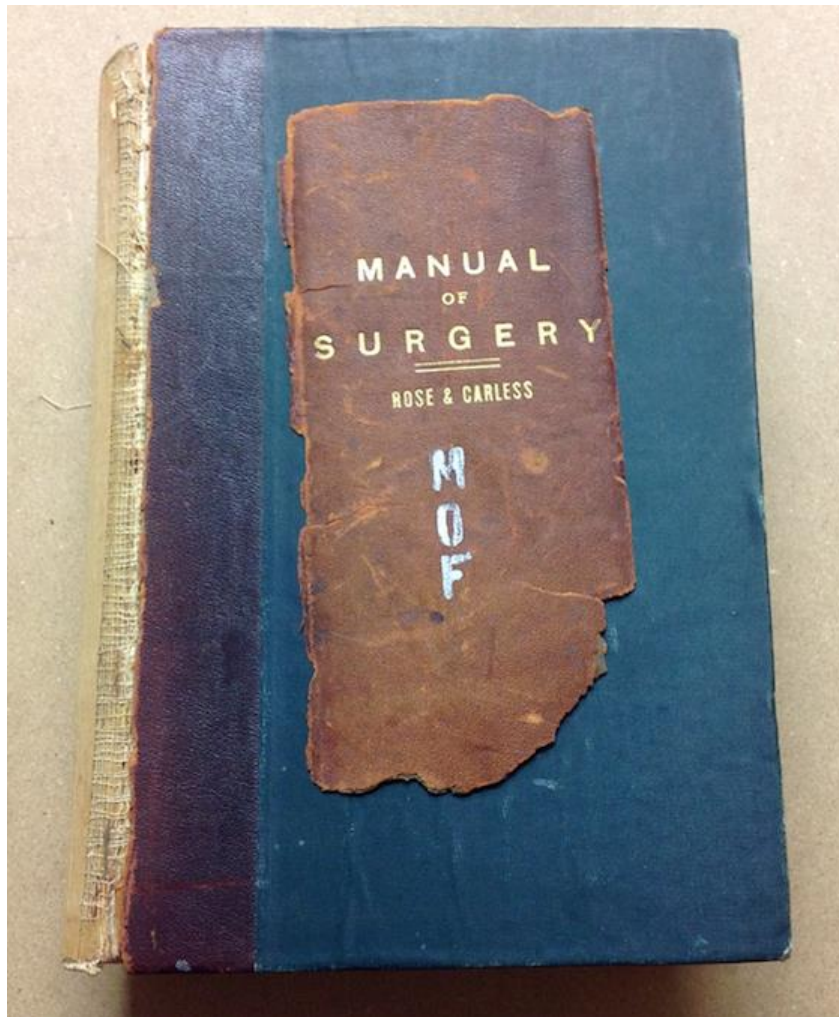

Appendix 1 to Kryshtalskyj M, Vance J, McAlister C. A message in a bottle: the discovery of a young medical officer's map from the 1917 Battle of Hill 70. Can J Surg 2018.  
DOI: 10.1503/cjs.012318

Online appendices are unedited and posted as supplied by the authors.

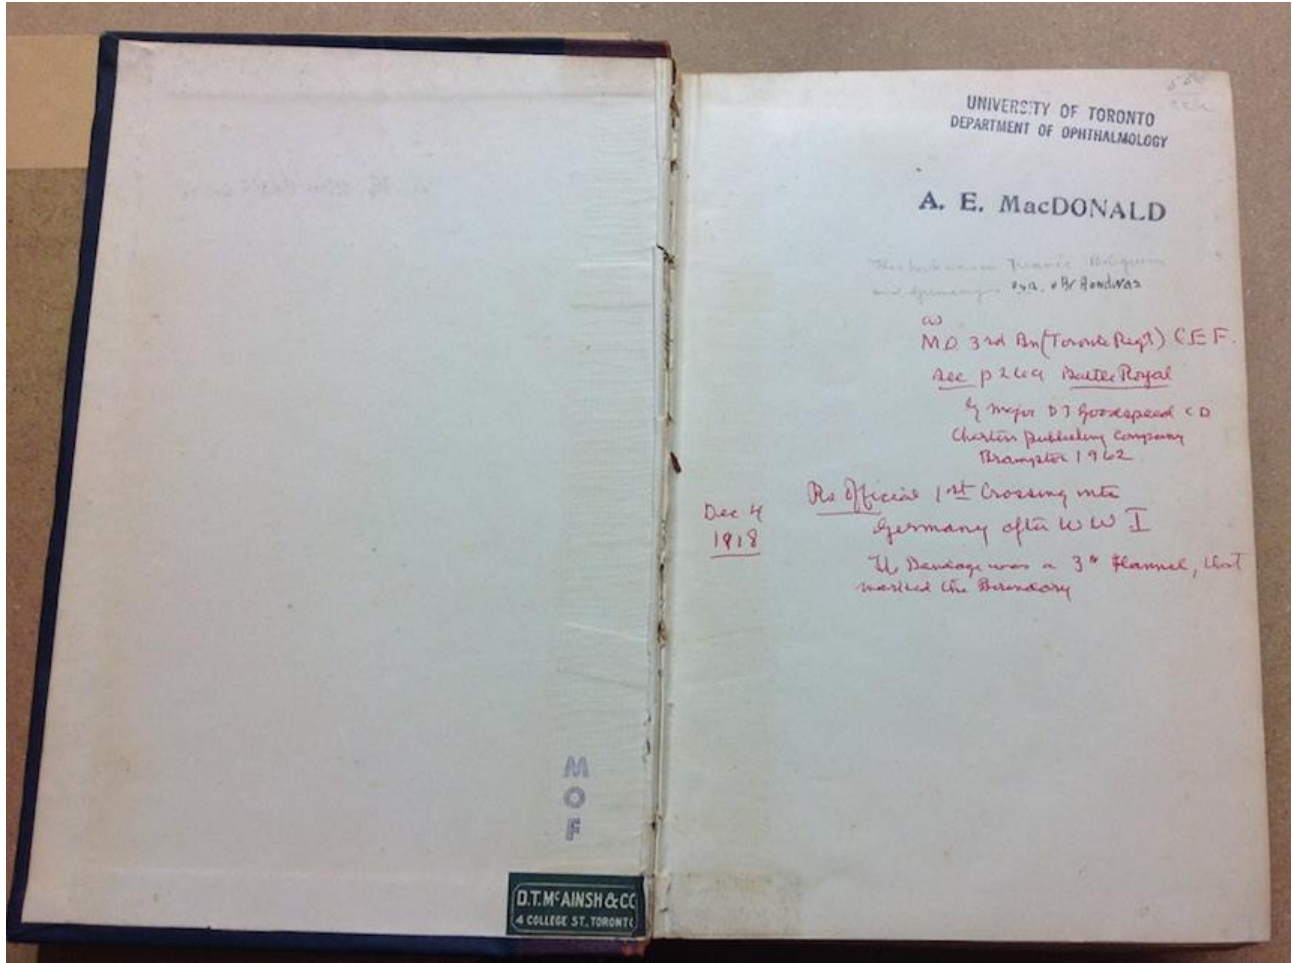

Supplement: cjs-012318-1-at.pdf [file cjs-012318-1-at.pdf]
